# Supplementary material for: Selective recognition of neurotransmitters in aqueous solution by hydroxyphenyl aza-scorpiand ligands
Source: Royal Society of Chemistry journal article supplement (doi:10.1039/d3ob00562c), 2023-01-01
Supplement: d3ob00562c1.pdf [file d3ob00562c1.pdf]

**Supporting Information**

Selective Recognition of Neurotransmitters in  
Aqueous Solution by Hydroxyphenyl Aza-  
Scorpiand Ligands.

*Begoña Verdejo, Mario Inclán, Salvador Blasco, Rafael Ballesteros-Garrido, Matteo Savastano, Antonio Bianchi, and Enrique García-España.*

## Table of contents

**Figure S1.** Distribution diagram for **L2** overlapped to UV-VIS data for 293 nm.  
Determined in  $0.15 \text{ mol}\cdot\text{dm}^{-3}$  NaCl at  $298.1 \pm 0.1 \text{ K}$  with  $[\text{L1}] = 10^{-4} \text{ mol}\cdot\text{dm}^{-3}$

**Figure S2.** Distribution diagram for **L3** overlapped to UV-VIS data for 293 nm.  
Determined in  $0.15 \text{ mol}\cdot\text{dm}^{-3}$  NaCl at  $298.1 \pm 0.1 \text{ K}$  with  $[\text{L1}] = 10^{-4} \text{ mol}\cdot\text{dm}^{-3}$

**Figure S3.** Variation of the  $^1\text{H}$  NMR spectra of **L1** with pD.

**Figure S4.** Variation of the  $^{13}\text{C}$  NMR spectra of **L1** with pD.

**Table S1.** Stepwise protonation constants for **L3** determined at 298.1 K in  $0.15 \text{ mol}\cdot\text{dm}^{-3}$  NaCl

**Table S2.** Stepwise stability constants for the formation of dopamine complexes with **L1** – **L4** in  $0.15 \text{ mol}\cdot\text{dm}^{-3}$  NaCl at 298.1 K

**Table S3.** Stepwise stability constants for the formation of serotonin complexes with **L1** – **L5** in  $0.15 \text{ mol}\cdot\text{dm}^{-3}$  NaCl at 298.1 K

**Table S4.** Stepwise stability constants for the formation of tyramine complexes with **L1** – **L4** in  $0.15 \text{ mol}\cdot\text{dm}^{-3}$  NaCl at 298.1 K

**Table S5.** Thermodynamic data for ligands and neurotransmitters protonation and for formation of **L1** complexes with serotonin determined at 298.1 K in  $0.15 \text{ mol}\cdot\text{dm}^{-3}$  NaCl.

**Figure S1.** Distribution diagram for **L2** overlapped to UV-VIS data for 293 nm.

Determined in  $0.15 \text{ mol}\cdot\text{dm}^{-3}$  NaCl at  $298.1 \pm 0.1 \text{ K}$  with  $[\text{L2}] = 10^{-4} \text{ mol}\cdot\text{dm}^{-3}$

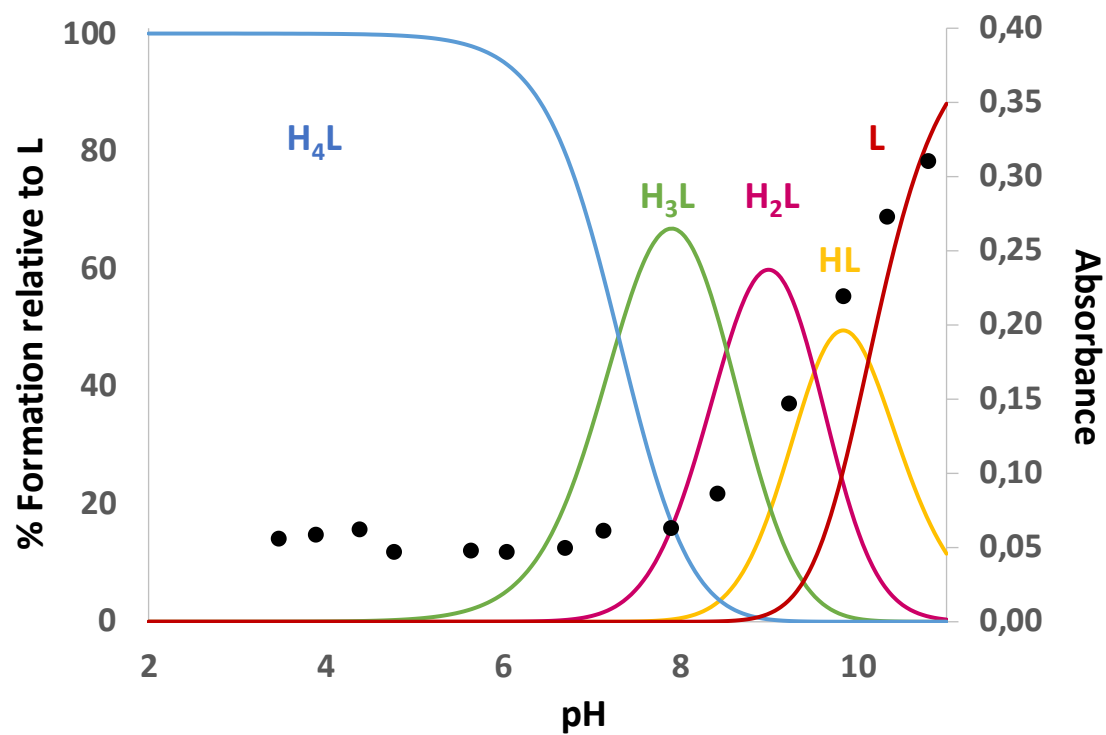

**Figure S2.** Distribution diagram for **L3** overlapped to UV-VIS data for 293 nm.

Determined in  $0.15 \text{ mol}\cdot\text{dm}^{-3}$  NaCl at  $298.1 \pm 0.1 \text{ K}$  with  $[\text{L3}] = 10^{-4} \text{ mol}\cdot\text{dm}^{-3}$

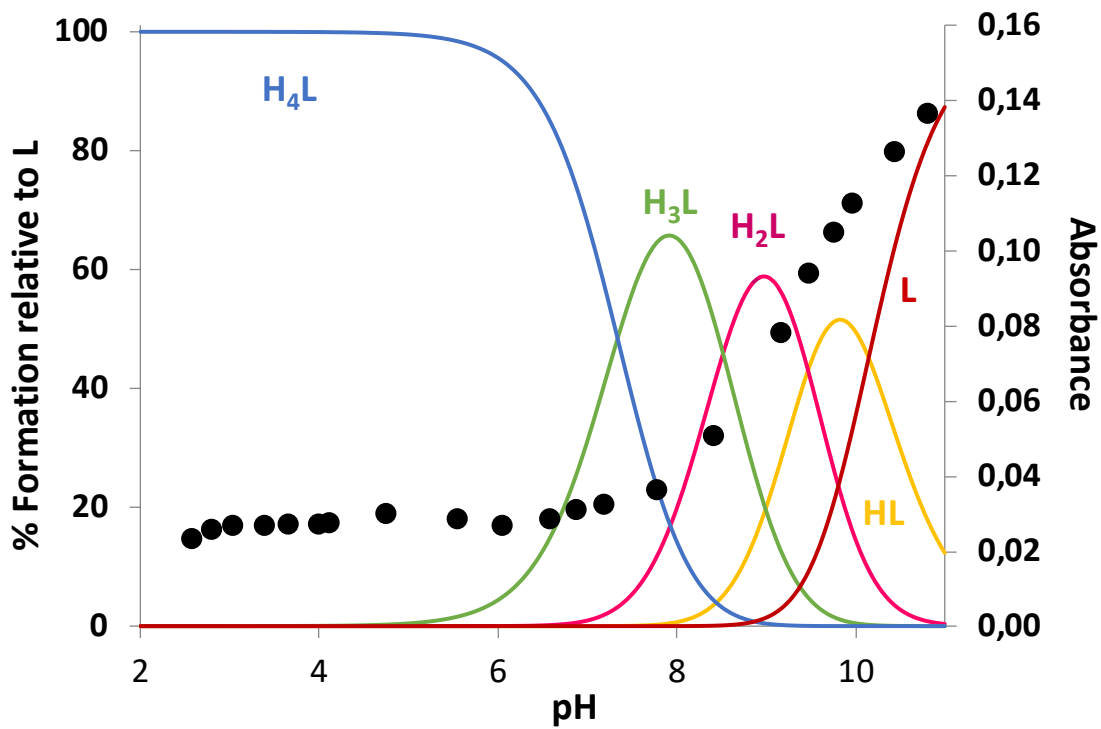

**Figure S3.** Variation of the  $^1\text{H}$  NMR spectra of **L1** with pD.

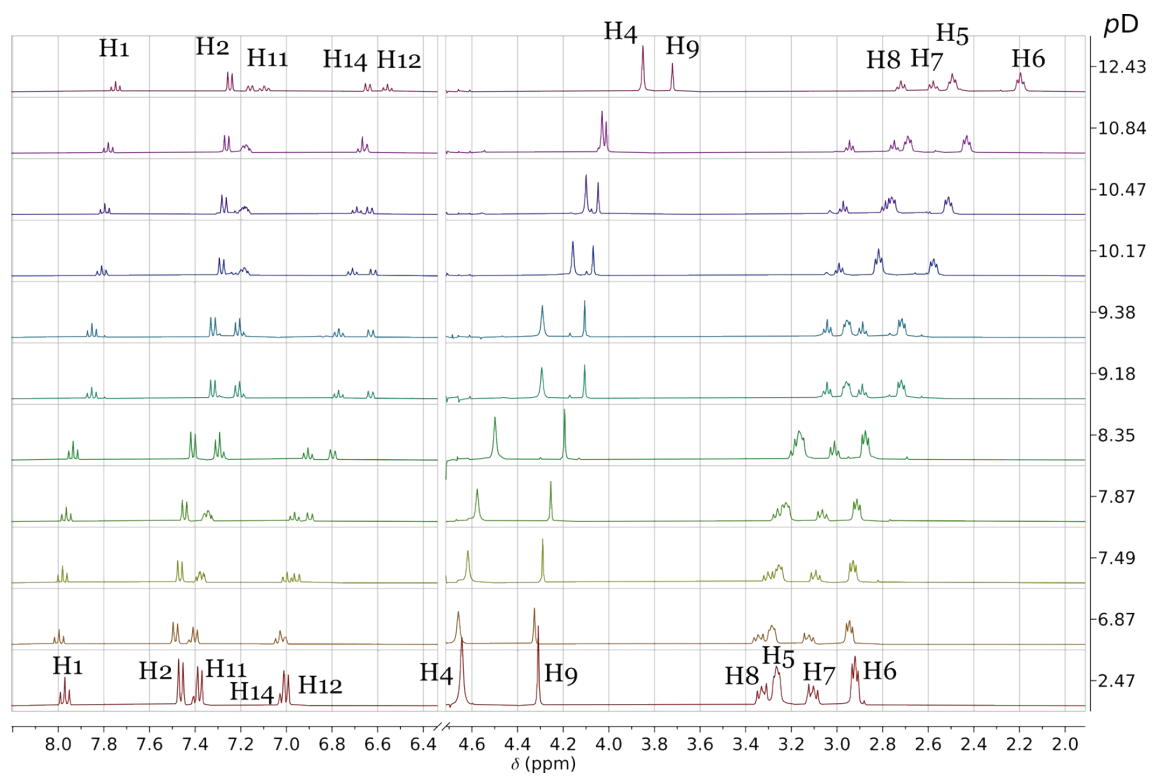

**Figure S4.** Variation of the  $^{13}\text{C}$  NMR spectra of **L1** with pD.

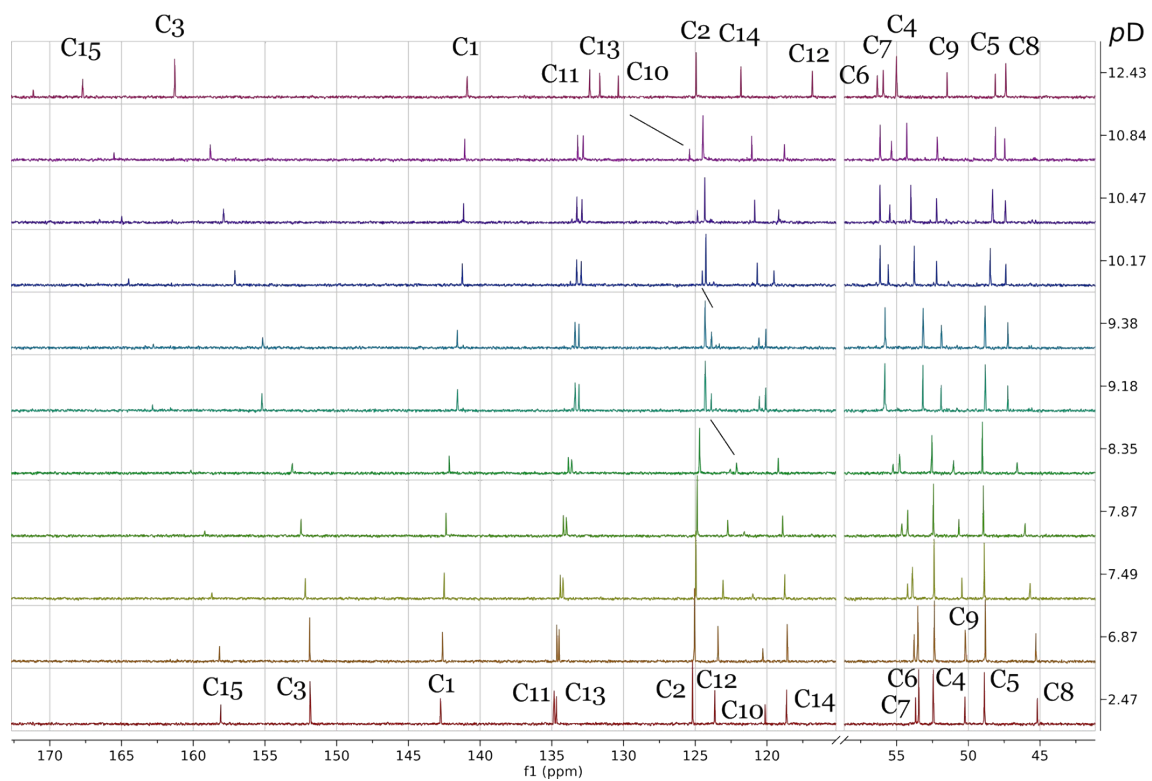

**Table S1.** Stepwise protonation constants for **L3** determined at 298.1 K in 0.15 mol·dm<sup>-3</sup> NaCl

The analysis of different UV–Vis data sets centered on the phenolate band by HypSpec program,<sup>i</sup> allows to calculate a pK value of 9.53 (2), 8.40 (3) y 7.20 (4) for **L3**. These values are in agreement with the results obtained by the potentiometric measurements.

| Reaction <sup>a</sup>                   | UV-Visible | EMF       |
|-----------------------------------------|------------|-----------|
| H + L ⇌ HL                              | -          | 10.153(9) |
| H + HL ⇌ H <sub>2</sub> L               | 9.53 (2)   | 9.473(9)  |
| H + H <sub>2</sub> L ⇌ H <sub>3</sub> L | 8.40 (3)   | 8.516(8)  |
| H + H <sub>3</sub> L ⇌ H <sub>4</sub> L | 7.20 (4)   | 7.341(9)  |

(a) Charges omitted. (b) Values in parenthesis are standard deviations in the last significant figure.

**Table S2.** Stepwise stability constants for the formation of dopamine complexes with **L1** – **L4** in 0.15 mol·dm<sup>-3</sup> NaCl at 298.1 K

| Reaction                                                | L1                    | L2       | L3       | L4       |
|---------------------------------------------------------|-----------------------|----------|----------|----------|
| AH + L ⇌ AHL <sup>a</sup>                               | –                     | –        | 3.39 (6) | –        |
| HA + HL ⇌ AH <sub>2</sub> L                             | 3.37 (8) <sup>b</sup> | 3.63 (6) | 4.07 (4) | 3.25 (5) |
| H <sub>2</sub> A + L ⇌ AH <sub>2</sub> L                | –                     | –        | 3.82 (4) | –        |
| H <sub>2</sub> A + HL ⇌ AH <sub>3</sub> L               | 3.76 (2)              | 3.54 (3) | 3.77 (4) | 3.03 (3) |
| H <sub>2</sub> A + H <sub>2</sub> L ⇌ AH <sub>4</sub> L | 4.13 (3)              | 3.60 (6) | 4.18 (4) | 3.44 (4) |
| H <sub>3</sub> A + HL ⇌ AH <sub>4</sub> L               | –                     | –        | 4.10 (4) | –        |
| H <sub>3</sub> A + H <sub>2</sub> L ⇌ AH <sub>5</sub> L | 3.98 (3)              | 3.78 (4) | 3.87 (4) | 3.32 (3) |
| H <sub>3</sub> A + H <sub>3</sub> L ⇌ AH <sub>6</sub> L | 4.01 (3)              | 3.62 (4) | 3.85 (4) | 3.33(3)  |
| H <sub>3</sub> A + H <sub>4</sub> L ⇌ AH <sub>7</sub> L | 3.95 (7)              | 3.51 (5) | –        | –        |

(a) Charges omitted. b) Values in parenthesis are standard deviations in the last significant figure.



**Table S3.** Stepwise stability constants for the formation of serotonin complexes with **L1** – **L5** in 0.15 mol·dm<sup>-3</sup> NaCl at 298.1 K

| <b>Reaction</b>                                         | <b>L1</b>             | <b>L2</b> | <b>L3</b> | <b>L4</b> | <b>L5</b> |
|---------------------------------------------------------|-----------------------|-----------|-----------|-----------|-----------|
| HL + HA ⇌ H <sub>2</sub> LA <sup>a</sup>                | 4.14 (2) <sup>b</sup> | 3.22(3)   | 3.74 (2)  | 2.97(3)   | 2.89(2)   |
| HL + H <sub>2</sub> A ⇌ H <sub>3</sub> LA               | 4.23 (1)              | 3.00(3)   | 3.57 (2)  | 2.73(2)   | 2.87(2)   |
| H <sub>2</sub> L + H <sub>2</sub> A ⇌ H <sub>4</sub> LA | 4.60 (1)              | 2.72(4)   | 3.61 (2)  | 2.95(2)   | 2.77(1)   |
| H <sub>3</sub> L + H <sub>2</sub> A ⇌ H <sub>5</sub> LA | 4.93 (2)              | 2.32(7)   | 3.53 (3)  | 3.21(2)   | 2.76(1)   |
| H <sub>4</sub> L + H <sub>2</sub> A ⇌ H <sub>6</sub> LA | 5.11 (3)              |           | 3.48 (2)  | –         | –         |

(a) Charges omitted. b) Values in parenthesis are standard deviations in the last significant figure.

**Table S4.** Stepwise stability constants for the formation of tyramine complexes with **L1** – **L5** in 0.15 mol·dm<sup>-3</sup> NaCl at 298.1 K

| <b>Reaction</b>                                         | <b>L1</b>            | <b>L2</b> | <b>L3</b> | <b>L4</b> | <b>L5</b> |
|---------------------------------------------------------|----------------------|-----------|-----------|-----------|-----------|
| HL + A ⇌ HLA                                            | –                    | –         |           | 2.93(8)   | –         |
| HL + HA ⇌ H <sub>2</sub> LA <sup>a</sup>                | 3.13(3) <sup>b</sup> | 3.68(2)   | 3.31(2)   | 3.18(3)   | –         |
| H <sub>2</sub> L + HA ⇌ H <sub>3</sub> LA               | -                    | 3.73(2)   | -         | -         |           |
| HL + H <sub>2</sub> A ⇌ H <sub>3</sub> LA               | 3.67(2)              | -         | 3.61(2)   | 3.35(4)   | –         |
| H <sub>2</sub> L + H <sub>2</sub> A ⇌ H <sub>4</sub> LA | 3.49(2)              | 3.83(2)   | 3.54(2)   | 3.35(3)   | –         |
| H <sub>3</sub> L + H <sub>2</sub> A ⇌ H <sub>5</sub> LA | 3.59(3)              | 3.84(2)   | 3.50(2)   | 3.38(4)   | –         |
| H <sub>4</sub> L + H <sub>2</sub> A ⇌ H <sub>6</sub> LA | 3.64(5)              | 3.88(2)   | 3.59(3)   |           | –         |

(a) Charges omitted. b) Values in parenthesis are standard deviations in the last significant figure.

**Table S5.** Thermodynamic data for ligands and neurotransmitters protonation and for the formation of **L1** complexes with serotonin determined at 298.1 K in 0.15 mol·dm<sup>-3</sup> NaCl.

| Reaction <sup>a</sup>                                      | logK <sup>b</sup>      | $\Delta G^\circ$ (kJ/mol) <sup>b</sup> | $\Delta H^\circ$ (kJ/mol) <sup>c</sup> | $T\Delta S^\circ$ (kJ/mol) <sup>d</sup> |
|------------------------------------------------------------|------------------------|----------------------------------------|----------------------------------------|-----------------------------------------|
| <b>L5</b>                                                  |                        |                                        |                                        |                                         |
| L + H $\rightleftharpoons$ HL                              | 10.338(9) <sup>c</sup> | -58.99(5)                              | -44.3(1)                               | 14.7(1)                                 |
| HL + H $\rightleftharpoons$ H <sub>2</sub> L               | 9.395(9)               | -53.60(5)                              | -51.9(1)                               | 1.7(1)                                  |
| H <sub>2</sub> L + H $\rightleftharpoons$ H <sub>3</sub> L | 8.23(1)                | -46.96(6)                              | -46.1(1)                               | 0.9(1)                                  |
|                                                            |                        |                                        |                                        |                                         |
| <b>L4</b>                                                  |                        |                                        |                                        |                                         |
| L + H $\rightleftharpoons$ HL                              | 10.006(4)              | -57.09(2)                              | -40.4(2)                               | 16.7(2)                                 |
| HL + H $\rightleftharpoons$ H <sub>2</sub> L               | 8.746(3)               | -49.90(2)                              | -48.4(2)                               | 1.5(2)                                  |
| H <sub>2</sub> L + H $\rightleftharpoons$ H <sub>3</sub> L | 7.368(4)               | -42.04(2)                              | -46.6(2)                               | -4.6(2)                                 |
|                                                            |                        |                                        |                                        |                                         |
| <b>L3</b>                                                  |                        |                                        |                                        |                                         |
| L + H $\rightleftharpoons$ HL                              | 10.153(9)              | -57.93(5)                              | -37.6(1)                               | 20.3(2)                                 |
| HL + H $\rightleftharpoons$ H <sub>2</sub> L               | 9.473(9)               | -54.05(5)                              | -37.5(1)                               | 16.6(2)                                 |
| H <sub>2</sub> L + H $\rightleftharpoons$ H <sub>3</sub> L | 8.516(8)               | -48.59(5)                              | -43.0(1)                               | 5.6(2)                                  |
| H <sub>3</sub> L + H $\rightleftharpoons$ H <sub>4</sub> L | 7.341(9)               | -41.89(5)                              | -46.1(1)                               | -4.2(2)                                 |
|                                                            |                        |                                        |                                        |                                         |
| <b>L2</b>                                                  |                        |                                        |                                        |                                         |
| L + H $\rightleftharpoons$ HL                              | 10.13(2)               | -57.8(1)                               | -36.7(1)                               | 21.1(2)                                 |
| HL + H $\rightleftharpoons$ H <sub>2</sub> L               | 9.50(1)                | -54.20(6)                              | -36.0(1)                               | 18.2(2)                                 |
| H <sub>2</sub> L + H $\rightleftharpoons$ H <sub>3</sub> L | 8.52(2)                | -48.6(1)                               | -44.5(1)                               | 4.1(2)                                  |
| H <sub>3</sub> L + H $\rightleftharpoons$ H <sub>4</sub> L | 7.30(2)                | -41.7(1)                               | -45.0(1)                               | -3.3(2)                                 |
|                                                            |                        |                                        |                                        |                                         |
| <b>L1</b>                                                  |                        |                                        |                                        |                                         |
| L + H $\rightleftharpoons$ HL                              | 9.93(1)                | -56.66(6)                              | -39.02(5)                              | 17.6(1)                                 |
| HL + H $\rightleftharpoons$ H <sub>2</sub> L               | 9.11(1)                | -51.98(6)                              | -40.6(1)                               | 11.4(2)                                 |
| H <sub>2</sub> L + H $\rightleftharpoons$ H <sub>3</sub> L | 7.92(1)                | -45.19(6)                              | -43.1(1)                               | 2.1(2)                                  |
| H <sub>3</sub> L + H $\rightleftharpoons$ H <sub>4</sub> L | 6.76(1)                | -38.57(6)                              | -38.5(1)                               | 0.1(2)                                  |
|                                                            |                        |                                        |                                        |                                         |
| <b>Tyramine</b>                                            |                        |                                        |                                        |                                         |
| T + H $\rightleftharpoons$ HT                              | 10.399(2)              | -59.33(1)                              | -45.9(2)                               | 13.4(2)                                 |

|                                                                                             |           |           |          |         |
|---------------------------------------------------------------------------------------------|-----------|-----------|----------|---------|
| HT + H $\rightleftharpoons$ H <sub>2</sub> T                                                | 9.333(2)  | -52.25(1) | -33.5(2) | 18.8(2) |
|                                                                                             |           |           |          |         |
| <b>Serotonin</b>                                                                            |           |           |          |         |
| S + H $\rightleftharpoons$ HS                                                               | 10.765(4) | -61.42(2) | -41.6(2) | 19.0(2) |
| HS + H $\rightleftharpoons$ H <sub>2</sub> S                                                | 9.931(3)  | -56.66(2) | -44.0(2) | 12.7(2) |
|                                                                                             |           |           |          |         |
| <b>L5 + Serotonin</b>                                                                       |           |           |          |         |
| HS + HL $\rightleftharpoons$ HS(HL)                                                         | 2.89(2)   | -16.5(1)  | 16.1(7)  | 32.6(8) |
| H <sub>2</sub> S + HL $\rightleftharpoons$ H <sub>2</sub> S(HL)                             | 2.87(2)   | -16.4(1)  | 23.1(7)  | 39.5(8) |
| H <sub>2</sub> S + H <sub>2</sub> L $\rightleftharpoons$ H <sub>2</sub> S(H <sub>2</sub> L) | 2.77(1)   | -15.80(6) | 27.6(8)  | 43.4(9) |
| H <sub>2</sub> S + H <sub>3</sub> L $\rightleftharpoons$ H <sub>2</sub> S(H <sub>3</sub> L) | 2.76(1)   | -15.75(6) | 26.5(8)  | 42.3(9) |
|                                                                                             |           |           |          |         |
| <b>L4 + Tyramine</b>                                                                        |           |           |          |         |
| HT + L $\rightleftharpoons$ HT(L)                                                           | 2.93(8)   | -16.7(5)  | 20.5(4)  | 37.2(9) |
| HT + HL $\rightleftharpoons$ HT(HL)                                                         | 3.18(3)   | -18.1(2)  | 18.9(4)  | 37.0(6) |
| H <sub>2</sub> T + HL $\rightleftharpoons$ H <sub>2</sub> T(HL)                             | 3.35(4)   | -19.1(2)  | 15.0(4)  | 34.1(6) |
| H <sub>2</sub> T + H <sub>2</sub> L $\rightleftharpoons$ H <sub>2</sub> T(H <sub>2</sub> L) | 3.35(3)   | -19.1(2)  | 16.1(4)  | 35.2(6) |
| H <sub>2</sub> T + H <sub>3</sub> L $\rightleftharpoons$ H <sub>2</sub> T(H <sub>3</sub> L) | 3.38(4)   | -19.3(2)  | 15.1(4)  | 34.4(6) |
|                                                                                             |           |           |          |         |
| <b>L4 + Serotonin</b>                                                                       |           |           |          |         |
| HS + HL $\rightleftharpoons$ HS(HL)                                                         | 2.97(3)   | -16.9(2)  | 12.5(4)  | 29.4(6) |
| H <sub>2</sub> S + HL $\rightleftharpoons$ H <sub>2</sub> S(HL)                             | 2.73(2)   | -15.6(1)  | 10.0(4)  | 25.6(5) |
| H <sub>2</sub> S + H <sub>2</sub> L $\rightleftharpoons$ H <sub>2</sub> S(H <sub>2</sub> L) | 2.95(2)   | -16.8(1)  | 9.7(4)   | 26.5(5) |
| H <sub>2</sub> S + H <sub>3</sub> L $\rightleftharpoons$ H <sub>2</sub> S(H <sub>3</sub> L) | 3.21(2)   | -18.3(1)  | 7.0 (4)  | 25.3(5) |
|                                                                                             |           |           |          |         |
| <b>L3 + Tyramine</b>                                                                        |           |           |          |         |
|                                                                                             |           |           |          |         |
| HT + HL $\rightleftharpoons$ HT(HL)                                                         | 3.31(2)   | -18.9(1)  | 10.2(4)  | 29.1(5) |
| H <sub>2</sub> T + HL $\rightleftharpoons$ H <sub>2</sub> T(HL)                             | 3.61(2)   | -20.6(1)  | 10.8(4)  | 31.4(5) |
| H <sub>2</sub> T + H <sub>2</sub> L $\rightleftharpoons$ H <sub>2</sub> T(H <sub>2</sub> L) | 3.54(2)   | -20.2(1)  | 10.3(4)  | 30.5(5) |
| H <sub>2</sub> T + H <sub>3</sub> L $\rightleftharpoons$ H <sub>2</sub> T(H <sub>3</sub> L) | 3.50(2)   | -20.0(1)  | 12.9(3)  | 32.9(4) |
| H <sub>2</sub> T + H <sub>4</sub> L $\rightleftharpoons$ H <sub>2</sub> T(H <sub>4</sub> L) | 3.59(3)   | -20.5(2)  | 13.9(3)  | 34.4(5) |
|                                                                                             |           |           |          |         |
| <b>L3 + Serotonin</b>                                                                       |           |           |          |         |
|                                                                                             |           |           |          |         |

|                                                                                             |         |           |         |         |
|---------------------------------------------------------------------------------------------|---------|-----------|---------|---------|
| HS + HL $\rightleftharpoons$ HS(HL)                                                         | 3.74(2) | -21.3(1)  | 22.0(5) | 43.3(6) |
| H <sub>2</sub> S + HL $\rightleftharpoons$ H <sub>2</sub> S(HL)                             | 3.57(2) | -20.4(1)  | 21.1(5) | 41.5(6) |
| H <sub>2</sub> S + H <sub>2</sub> L $\rightleftharpoons$ H <sub>2</sub> S(H <sub>2</sub> L) | 3.61(2) | -20.6(1)  | 16.3(5) | 37.1(6) |
| H <sub>2</sub> S + H <sub>3</sub> L $\rightleftharpoons$ H <sub>2</sub> S(H <sub>3</sub> L) | 3.53(3) | -20.1(2)  | 16.1(5) | 36.2(7) |
| H <sub>2</sub> S + H <sub>4</sub> L $\rightleftharpoons$ H <sub>2</sub> S(H <sub>4</sub> L) | 3.48(2) | -19.9(1)  | 17.2(5) | 37.1(6) |
| <b>L2 + Tyramine</b>                                                                        |         |           |         |         |
| HT + HL $\rightleftharpoons$ HT(HL)                                                         | 3.68(2) | -21.0(1)  | 10.0(6) | 31.0(7) |
| HT + H <sub>2</sub> L $\rightleftharpoons$ HT(H <sub>2</sub> L)                             | 3.73(2) | -21.3(1)  | 10.7(7) | 32.0(8) |
| H <sub>2</sub> T + H <sub>2</sub> L $\rightleftharpoons$ H <sub>2</sub> T(H <sub>2</sub> L) | 3.83(2) | -21.9(1)  | 7.5(7)  | 29.4(8) |
| H <sub>2</sub> T + H <sub>3</sub> L $\rightleftharpoons$ H <sub>2</sub> T(H <sub>3</sub> L) | 3.84(2) | -21.9(1)  | 7.7(7)  | 29.6(8) |
| H <sub>2</sub> T + H <sub>4</sub> L $\rightleftharpoons$ H <sub>2</sub> T(H <sub>4</sub> L) | 3.88(2) | -22.1(1)  | 6.9 (7) | 29.0(8) |
| <b>L2 + Serotonin</b>                                                                       |         |           |         |         |
| HS + HL $\rightleftharpoons$ HS(HL)                                                         | 3.22(3) | -18.4(2)  | 14.4(5) | 32.8(7) |
| H <sub>2</sub> S + HL $\rightleftharpoons$ H <sub>2</sub> S(HL)                             | 3.00(3) | -17.1(2)  | 13.4(5) | 30.5(7) |
| H <sub>2</sub> S + H <sub>2</sub> L $\rightleftharpoons$ H <sub>2</sub> S(H <sub>2</sub> L) | 2.72(4) | -15.5(2)  | 5.8(4)  | 21.3(6) |
| H <sub>2</sub> S + H <sub>3</sub> L $\rightleftharpoons$ H <sub>2</sub> S(H <sub>3</sub> L) | 2.32(7) | -13.2(4)  | 6.1(4)  | 19.3(6) |
| <b>L1 + Tyramine</b>                                                                        |         |           |         |         |
| HT + HL $\rightleftharpoons$ HT(HL)                                                         | 3.13(4) | -17.9(2)  | 16.7(5) | 34.6(7) |
| H <sub>2</sub> T + HL $\rightleftharpoons$ H <sub>2</sub> T(HL)                             | 3.67(2) | -20.9(1)  | 15.7(4) | 36.6(5) |
| H <sub>2</sub> T + H <sub>2</sub> L $\rightleftharpoons$ H <sub>2</sub> T(H <sub>2</sub> L) | 3.49(2) | -19.9(1)  | 19.5(5) | 39.4(6) |
| H <sub>2</sub> T + H <sub>3</sub> L $\rightleftharpoons$ H <sub>2</sub> T(H <sub>3</sub> L) | 3.60(3) | -20.5(2)  | 19.0(4) | 39.5(6) |
| H <sub>2</sub> T + H <sub>4</sub> L $\rightleftharpoons$ H <sub>2</sub> T(H <sub>4</sub> L) | 3.64(5) | -20.8(3)  | 17.4(5) | 38.2(8) |
| <b>L1 + Serotonin</b>                                                                       |         |           |         |         |
| HS + HL $\rightleftharpoons$ HS(HL)                                                         | 4.14(2) | -23.6(1)  | 20.9(4) | 44.5(5) |
| H <sub>2</sub> S + HL $\rightleftharpoons$ H <sub>2</sub> S(HL)                             | 4.23(1) | -24.14(6) | 18.5(4) | 42.6(5) |
| H <sub>2</sub> S + H <sub>2</sub> L $\rightleftharpoons$ H <sub>2</sub> S(H <sub>2</sub> L) | 4.60(2) | -26.2(1)  | 16.0(4) | 42.2(5) |
| H <sub>2</sub> S + H <sub>3</sub> L $\rightleftharpoons$ H <sub>2</sub> S(H <sub>3</sub> L) | 4.94(2) | -28.2(1)  | 14.6(4) | 42.8(5) |

|                                                                                                     |         |          |        |         |
|-----------------------------------------------------------------------------------------------------|---------|----------|--------|---------|
| $\text{H}_2\text{S} + \text{H}_4\text{L} \rightleftharpoons \text{H}_2\text{S}(\text{H}_4\text{L})$ | 5.14(3) | -29.3(2) | 7.9(4) | 37.2(6) |
|-----------------------------------------------------------------------------------------------------|---------|----------|--------|---------|

(a) Charges omitted. (b) Obtained by means of potentiometric measurements. (c) Obtained by means of ITC. (d) Obtained from  $\Delta G^\circ = \Delta H^\circ - T\Delta S^\circ$ . (e) Values in parenthesis are standard deviations in the last significant figure.

---

<sup>i</sup> P. Gans, A. Sabatini and A. Vacca, Determination of equilibrium constants from spectrophometric data obtained from solutions of known pH: The program pHab. *Annali di Chimica*, 1999, **89**, 45-49
